# Supplementary material for: Oral delivery of electrohydrodynamically encapsulated Lactiplantibacillus plantarum CRD7 modulates gut health, antioxidant activity, and cytokines-related inflammation and immunity in mice
Source: Royal Society of Chemistry journal article supplement (doi:10.1039/d4fo02732a), 2024-01-01
Supplement: d4fo02732a1.pdf [file d4fo02732a1.pdf]

## Supplementary Information (SI)

### Oral delivery of electrodynamically encapsulated *Lactiplantibacillus plantarum* CRD7 modulates gut health, antioxidant activity, and cytokines related inflammation and immunity in mice

Vinay Venkatesh Varada<sup>1</sup>, Sachin Kumar<sup>1\*</sup>, Sravani Balaga<sup>1</sup>, Antony Johnson Thanippilly<sup>1</sup>, Heartwin A. Pushpadass<sup>2</sup>, Rashmi, H. M<sup>3</sup>, Babu Lal Jangir<sup>3</sup>, Nitin Tyagi<sup>1</sup>, Ashish Kumar Samanta<sup>1</sup>

<sup>1</sup>Rumen Biotechnology Lab., Animal Nutrition Division, ICAR-National Dairy Research Institute, Karnal-132001, Haryana, India

<sup>2</sup>Dairy Engineering Section, ICAR-National Dairy Research Institute, Southern Regional Station, Bengaluru, India

<sup>3</sup>Department of Veterinary Pathology, College of Veterinary Sciences, Lala Lajpat Rai University of Veterinary and Animal Sciences, Hisar-125004, India

\*Corresponding author: email: [arensachin@gmail.com](mailto:arensachin@gmail.com) (Sachin Kumar); Phone number: +91-1842259069

#### The PDF file includes:

#### Supplementary figures

**Supplementary Fig. 1:** Digital photography of physical appearance, macroscopic intraabdominal view and stool pictures of mice among different dietary treatment groups

**Supplementary Fig. 2.** Standard curve of *Lactobacillus*, *Bifidobacterium*, *Escherichia coli*, and *Clostridia perfringens* constructed by absolute quantitative real time PCR (qRT-PCR)

#### Supplementary tables

**Supplementary Table 1** Composition of the mineral and vitamin mixture of purified diet fed to mice during the experiment

**Supplementary Table 2** Details of primers and protocol used in the quantification of bacteria DNA present in faeces and caecal digesta of mice by quantitative real time PCR technique

**Supplementary Table 3** Details of primers used for relative expression of gut permeability-associated genes by qRT-PCR

**Supplementary Table 4** Effects of non-encapsulated and encapsulated *L. plantarum* CRD7 on blood parameters of mice

**Supplementary Table 5** Effects of non-encapsulated and encapsulated *L. plantarum* CRD7 on biochemical parameters of mice

**Supplementary Table 6** The incidence of non-encapsulated and encapsulated *L. plantarum* CRD7 translocation during subacute exposure to mice

**Supplementary Table 7** Pearson's correlation matrix of various parameters assessed in this study

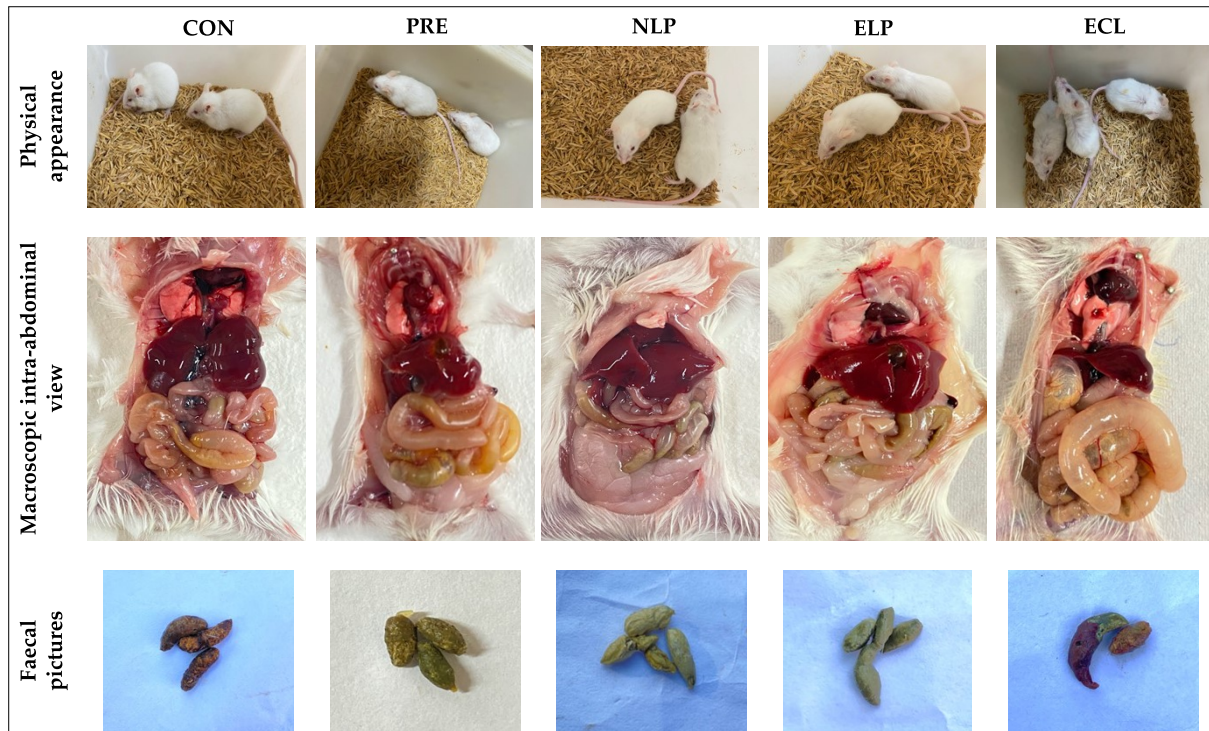

**Supplementary Fig. 1.** Digital photography of physical appearance, macroscopic intraabdominal view, and stool pictures of mice among different dietary treatment groups. Mice in CON, PRE, NLP, and ELP appears to be healthy with improved lustrous hair coat and had normal stool. Whereas, ECL group mice were having piloerected hairs with inflamed visceral organs and bloody stool.

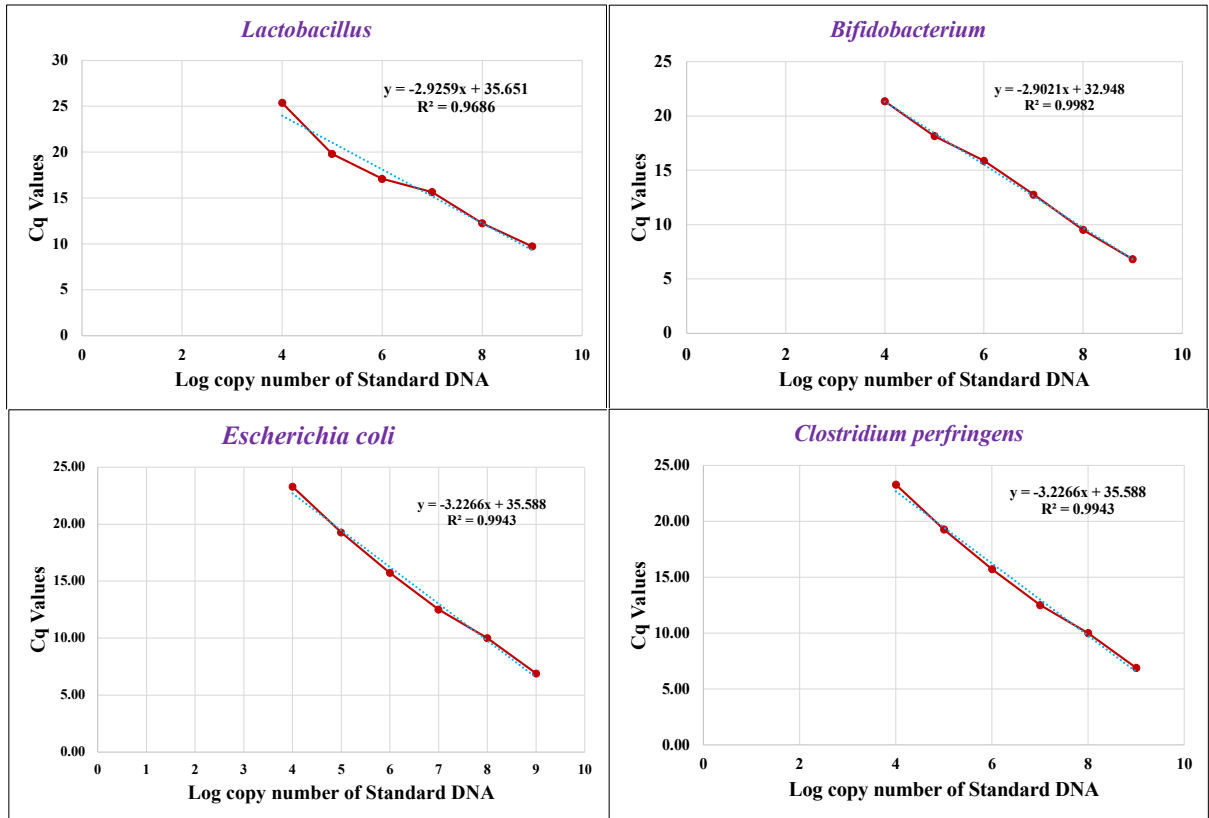

**Supplementary Fig. 2.** Standard curve of *Lactobacillus*, *Bifidobacterium*, *Escherichia coli*, and *Clostridia perfringens* constructed by absolute quantitative real time PCR (qRT-PCR)

**Supplementary Table 1** Composition of the mineral and vitamin mixture of purified diet fed to mice during the experiment

| <b>Mineral mixture (AIN-93G)</b>              |                   | <b>Vitamin mixture (AIN-93-VX)</b>                    |                     |
|-----------------------------------------------|-------------------|-------------------------------------------------------|---------------------|
| <b>Ingredients</b>                            | <b>Levels (%)</b> | <b>Ingredients</b>                                    | <b>Levels(g/kg)</b> |
| Calcium carbonate                             | 35.7              | Nicotinic acid                                        | 3.00                |
| Monopotassium phosphate                       | 19.6              | D-Calcium pantothenate                                | 1.60                |
| Potassium citrate monohydrate                 | 7.078             | Pyridoxine HCl                                        | 0.70                |
| Sodium chloride                               | 7.4               | Thiamine HCl                                          | 0.60                |
| Potassium sulfate                             | 4.66              | Riboflavin                                            | 0.60                |
| Magnesium oxide                               | 2.4               | Folic acid                                            | 0.20                |
| Ferric citrate                                | 0.606             | D-Biotin                                              | 0.02                |
| Zinc carbonate                                | 0.165             | Vitamin B <sub>12</sub> (0.1% triturated in mannitol) | 2.50                |
| Manganese carbonate                           | 0.063             | a-Tocopherol powder (250 U/gm)                        | 30.00               |
| Copper carbonate                              | 0.03              | Vitamin A palmitate (250,000 U/gm)                    | 1.60                |
| Sodium selenate, Anhydrous                    | 0.001             | Vitamin D3 (400,000 U/gm)                             | 0.25                |
| Potassium iodate                              | 0.00103           | Phylloquinone                                         | 0.0075              |
| Ammonium molybdate.4H <sub>2</sub> O          | 0.000795          | Powdered sucrose                                      | 959.655             |
| Sodium metasilicate.9H <sub>2</sub> O         | 0.145             |                                                       |                     |
| Chromium potassium sulfate.12H <sub>2</sub> O | 0.0275            |                                                       |                     |
| Lithium chloride                              | 0.00174           |                                                       |                     |
| Boric acid                                    | 0.008145          |                                                       |                     |
| Sodium fluoride                               | 0.00635           |                                                       |                     |
| Nickel carbonate                              | 0.00318           |                                                       |                     |
| Ammonium vanadate                             | 0.00066           |                                                       |                     |
| Powdered sugar                                | 22.1              |                                                       |                     |

**Supplementary Table 2** Details of primers and protocol used in the quantification of bacteria DNA present in faeces and caecal digesta of mice by quantitative real time PCR technique

| Bacterial group                | Primers Sequence (5' -3' )                                | Product size (bp) | Annealing temperature (°C) | Reference           |
|--------------------------------|-----------------------------------------------------------|-------------------|----------------------------|---------------------|
| <i>Lactobacillus</i>           | F:GAGGCAGCAGTAGGGAATCTTC<br>R:GGCCAGTTACTACCTCTATCCTTCTTC | 126               | 55                         | Martin et al., 2020 |
| <i>Bifidobacterium</i>         | F:TACACCGGAATAGCTCCTGG<br>R:CGTCAAGCTGATAGGACGC           | 115               | 58                         |                     |
| <i>Escherichia coli</i>        | F:AGAAGCTTGCTCTTTGCTGA<br>R:CTTTGGTCTTGCGACGTTAT          | 120               | 57                         |                     |
| <i>Clostridium perfringens</i> | F:TCATCATTCAACCAAGGAGCAATCC<br>R: CCTTGGTAGGCCGTTACCC     | 105               | 55                         |                     |

F, Forward; R, Reverse

**Reference:**

Martin, C.C., de Oliveira, S.M.F.N., dos Reis Costa, J.F., Baccili, C.C., Silva, B.T., Hurley, D.J., Gomes, V., 2020. Influence of feeding fresh colostrum from the dam or frozen colostrum from a pool on indicator gut microbes and the inflammatory response in neonatal calves. Res. Vet. Sci. 135, 355–365. <https://doi.org/10.1016/j.rvsc.2020.10.017>.

**Supplementary Table 3** Details of primers used for relative expression of gut permeability-associated genes by qRT-PCR

| Gene            | Primer Sequence (5' -3')                             | Amplicon length (bp) | Reference            |
|-----------------|------------------------------------------------------|----------------------|----------------------|
| Claudin-1       | F: CCCTTCAGCAGAGCAAGGTT<br>R: TAGGGCAACCAAGTGCCTTT   | 123                  | Santiya et al., 2020 |
| Zona occluden-1 | F: CCTAAGACCTGTAACCATCT<br>R: CTGATAGATATCTGGCTCCT   | 82                   |                      |
| Occludin        | F: ATGTCCGGCCGATGCTCTC<br>R: TTTGGCTGCTCTTGGGTCTGTAT | 308                  |                      |
| GAPDH           | F: GCACCGTCAAGGCTGAGAAC<br>R: TGGTGAAGACGCCAGTGGA    | 138                  |                      |

F, Forward; R, Reverse

**Reference:**

Santiya, M., Bhat, M.I., Gupta, T., Kapila, S., Kapila, R., 2020. Safety assessment of potential probiotic *Lactobacillus fermentum* MTCC-5898 in murine model after repetitive dose for 28 days (Sub-Acute Exposure). *Probiotics Antimicrob. Proteins* 12 (1), 259-270. <https://doi.org/10.1007/s12602-019-09529-6>.

**Supplementary Table 4** Effects of non-encapsulated and encapsulated *L. plantarum* CRD7 on blood parameters of mice

| Attributes              | Dietary groups <sup>†</sup> |                    |                    |                    |                    | SEM  | P value |
|-------------------------|-----------------------------|--------------------|--------------------|--------------------|--------------------|------|---------|
|                         | CON                         | PRE                | NLP                | ELP                | ECL                |      |         |
| Hb (g/dL)               | 11.04 <sup>b</sup>          | 11.24 <sup>b</sup> | 12.55 <sup>c</sup> | 12.61 <sup>c</sup> | 9.49 <sup>a</sup>  | 0.37 | 0.032   |
| HCT (%)                 | 46.12                       | 46.29              | 46.07              | 46.02              | 44.23              | 0.30 | 0.170   |
| RBC (millions/ $\mu$ L) | 8.98 <sup>b</sup>           | 9.00 <sup>b</sup>  | 9.04 <sup>b</sup>  | 9.06 <sup>b</sup>  | 6.43 <sup>a</sup>  | 0.30 | 0.005   |
| MCV (fl)                | 50.32 <sup>b</sup>          | 50.23 <sup>b</sup> | 50.73 <sup>b</sup> | 51.12 <sup>b</sup> | 45.75 <sup>a</sup> | 0.56 | 0.003   |
| MCH (pg)                | 13.56                       | 13.52              | 13.46              | 13.39              | 12.52              | 0.24 | 0.683   |
| MPV (fl)                | 8.14                        | 8.16               | 8.12               | 8.10               | 7.53               | 0.18 | 0.821   |
| MCHC (%)                | 27.14                       | 27.11              | 27.07              | 26.93              | 26.12              | 0.20 | 0.538   |
| WBC ( $10^3/\mu$ L)     | 10.22 <sup>a</sup>          | 10.15 <sup>a</sup> | 10.08 <sup>a</sup> | 10.09 <sup>a</sup> | 13.37 <sup>b</sup> | 0.36 | 0.001   |
| Neutrophils (%)         | 6.64 <sup>a</sup>           | 6.58 <sup>a</sup>  | 6.40 <sup>a</sup>  | 6.22 <sup>a</sup>  | 8.53 <sup>b</sup>  | 0.30 | 0.093   |
| Lymphocytes (%)         | 90.40 <sup>a</sup>          | 90.02 <sup>a</sup> | 90.14 <sup>a</sup> | 90.26 <sup>a</sup> | 93.53 <sup>b</sup> | 0.46 | 0.060   |

Dietary groups<sup>†</sup>: Basal diet with no supplementation (CON), supplemented with encapsulated material without probiotic (PRE; 100 mg), Supplemented with non-encapsulated *L. plantarum* CRD7 (NLP; 100  $\mu$ l/d/mouse), Supplemented with encapsulated *L. plantarum* CRD7 (ELP; 100 mg/d/mouse) having  $1 \times 10^9$  CFU/g of CRD7; Supplemented with *E. coli* (ECL;  $10^9$  CFU/mouse/d). SEM, Standard Error of Mean. <sup>a,b,c</sup>Means bearing different superscripts in a row (P < 0.05)



**Supplementary Table 5** Effects of non-encapsulated and encapsulated *L. plantarum* CRD7 on biochemical parameters of mice

| Attributes                | Dietary groups <sup>†</sup> |                    |                    |                    |                     | SEM  | P value |
|---------------------------|-----------------------------|--------------------|--------------------|--------------------|---------------------|------|---------|
|                           | CON                         | PRE                | NLP                | ELP                | ECL                 |      |         |
| Total protein (g/dL)      | 7.24 <sup>a</sup>           | 7.81 <sup>ab</sup> | 8.12 <sup>b</sup>  | 8.25 <sup>b</sup>  | 12.11 <sup>c</sup>  | 1.84 | <0.001  |
| Albumin (g/dL)            | 2.72 <sup>a</sup>           | 2.80 <sup>a</sup>  | 2.61 <sup>a</sup>  | 2.91 <sup>a</sup>  | 9.89 <sup>b</sup>   | 2.94 | <0.001  |
| Globulin (g/dL)           | 4.52 <sup>b</sup>           | 5.00 <sup>bc</sup> | 5.50 <sup>c</sup>  | 5.33 <sup>c</sup>  | 2.23 <sup>a</sup>   | 1.29 | <0.001  |
| A/G                       | 0.60 <sup>a</sup>           | 0.56 <sup>a</sup>  | 0.47 <sup>a</sup>  | 0.54 <sup>a</sup>  | 5.44 <sup>b</sup>   | 2.32 | <0.001  |
| Calcium (mg/dL)           | 9.32                        | 9.44               | 9.22               | 9.77               | 10.02               | 0.68 | 0.473   |
| Phosphorous (mg/dL)       | 12.80                       | 13.00              | 12.40              | 13.10              | 13.43               | 1.04 | 0.796   |
| SGOT (Unit/L)             | 51.30 <sup>a</sup>          | 50.40 <sup>a</sup> | 52.40 <sup>a</sup> | 51.20 <sup>a</sup> | 90.74 <sup>b</sup>  | 16.2 | <0.001  |
| SGPT (Unit/L)             | 35.30 <sup>a</sup>          | 34.90 <sup>a</sup> | 35.0 <sup>a</sup>  | 35.60 <sup>a</sup> | 92.12 <sup>b</sup>  | 23.4 | <0.001  |
| Urea (mg/dL)              | 53.20 <sup>a</sup>          | 54.40 <sup>a</sup> | 53.60 <sup>a</sup> | 54.70 <sup>a</sup> | 82.04 <sup>b</sup>  | 11.9 | <0.001  |
| Creatinine (mg/dL)        | 0.51 <sup>a</sup>           | 0.60 <sup>a</sup>  | 0.48 <sup>a</sup>  | 0.37 <sup>a</sup>  | 1.52 <sup>b</sup>   | 0.46 | <0.001  |
| Total cholesterol (mg/dL) | 110.0 <sup>a</sup>          | 109.0 <sup>a</sup> | 108.0 <sup>a</sup> | 109.0 <sup>a</sup> | 120.04 <sup>b</sup> | 5.42 | <0.001  |
| Triglycerides (mg/dL)     | 94.00 <sup>a</sup>          | 94.40 <sup>a</sup> | 94.60 <sup>a</sup> | 94.20 <sup>a</sup> | 98.22 <sup>b</sup>  | 2.42 | 0.050   |
| LDL- cholesterol (mg/dL)  | 26.00 <sup>a</sup>          | 26.90 <sup>a</sup> | 25.30 <sup>a</sup> | 25.10 <sup>a</sup> | 43.16 <sup>b</sup>  | 7.75 | <0.001  |
| HDL- cholesterol (mg/dL)  | 65.30 <sup>b</sup>          | 63.30 <sup>b</sup> | 64.20 <sup>b</sup> | 65.20 <sup>b</sup> | 57.50 <sup>a</sup>  | 3.32 | <0.001  |
| VLDL- cholesterol (mg/dL) | 18.80 <sup>a</sup>          | 18.83 <sup>a</sup> | 18.92 <sup>a</sup> | 18.87 <sup>a</sup> | 19.64 <sup>b</sup>  | 0.48 | 0.048   |
| Atherogenic index         | 0.15 <sup>a</sup>           | 0.17 <sup>a</sup>  | 0.16 <sup>a</sup>  | 0.16 <sup>a</sup>  | 0.23 <sup>b</sup>   | 0.02 | <0.001  |

Dietary groups<sup>†</sup>: Basal diet with no supplementation (CON), supplemented with encapsulated material without probiotic (PRE; 100 mg), Supplemented with non-encapsulated and *L. plantarum* CRD7 (NLP; 100 µl/d/mouse), Supplemented with encapsulated *L. plantarum* CRD7 (ELP; 100 mg/d/mouse) having 1x10<sup>9</sup> CFU/g of CRD7; Supplemented with *E. coli* (ECL; 10<sup>9</sup> CFU/mouse/d). SEM, Standard Error of Mean. <sup>a,b,c</sup>Means bearing different superscripts in a row (P < 0.05).

$$VLDL = \frac{Triglycerides}{5}, LDL = Total\ cholesterol - (HDL + VLDL), Atherogenic\ index = \frac{LDL}{HDL}$$

**Supplementary Table 6** The incidence of non-encapsulated and encapsulated *L. plantarum* CRD7 translocation during subacute exposure to mice

| Attributes    | Dietary groups <sup>†</sup> |     |     |     |            | No. of confirmed colonies by Gram staining | No. of confirmed colonies by PCR | % Translocation |
|---------------|-----------------------------|-----|-----|-----|------------|--------------------------------------------|----------------------------------|-----------------|
|               | CON                         | PRE | NLP | ELP | ECL        |                                            |                                  |                 |
| <b>Blood</b>  |                             |     |     |     |            |                                            |                                  |                 |
| MRS           | 0/8                         | 0/8 | 0/8 | 0/8 | 8/8 (>50)  | 0                                          | 0                                | 0               |
| BHI           | 0/8                         | 0/8 | 0/8 | 0/8 | 8/8 (>50)  | 0                                          | 0                                | 0               |
| <b>Liver</b>  |                             |     |     |     |            |                                            |                                  |                 |
| MRS           | 0/8                         | 0/8 | 0/8 | 0/8 | 8/8 (>50)  | 0                                          | 0                                | 0               |
| BHI           | 0/8                         | 0/8 | 0/8 | 0/8 | 8/8 (>50)  | 0                                          | 0                                | 0               |
| <b>Kidney</b> |                             |     |     |     |            |                                            |                                  |                 |
| MRS           | 0/8                         | 0/8 | 0/8 | 0/8 | 8/8 (>50)  | 0                                          | 0                                | 0               |
| BHI           | 0/8                         | 0/8 | 0/8 | 0/8 | 8/8 (>50)  | 0                                          | 0                                | 0               |
| <b>Spleen</b> |                             |     |     |     |            |                                            |                                  |                 |
| MRS           | 0/8                         | 0/8 | 0/8 | 0/8 | 8/8 (6-13) | 0                                          | 0                                | 0               |
| BHI           | 0/8                         | 0/8 | 0/8 | 0/8 | 8/8 (32)   | 0                                          | 0                                | 0               |
| <b>Lungs</b>  |                             |     |     |     |            |                                            |                                  |                 |
| MRS           | 0/8                         | 0/8 | 0/8 | 0/8 | 8/8 (9-12) | 0                                          | 0                                | 0               |
| BHI           | 0/8                         | 0/8 | 0/8 | 0/8 | 8/8 (20)   | 0                                          | 0                                | 0               |

Values are presented as the number of animals that were positive for bacterial translocation/total number of animals tested per group.

Numbers in brackets represents the number of colonies counted (CFU/g of tissue).

MRS, De Man Rogosa and Sharpe agar; BHI, brain heart infusion agar.

Dietary groups<sup>†</sup>: Basal diet with no supplementation (CON), supplemented with encapsulated material without probiotic (PRE; 100 mg), Supplemented with non-encapsulated *L. plantarum* CRD7 (NLP; 100 µl/d/mouse), Supplemented with encapsulated *L. plantarum* CRD7 (ELP; 100 mg/d/mouse) having 1x10<sup>9</sup> CFU/g of CRD7; Supplemented with *E. coli* (ECL; 10<sup>9</sup> CFU/mouse/d).

**Supplementary Table 7** Pearson's correlation matrix of various parameters assessed in this study

|                       | ABW     | AFI     | Faecal pH | Lactate | Ammonia | Acetate | Propionate | Butyrate | TSCFA   | LAB     | BIF     | <i>E. coli</i> | <i>C. perfringens</i> | SOD     | CAT     | GpX    | IgA     | IgG     | FITC    | IL-6    | IL-10   | TNF-alpha | TGF-beta | MCP-1   |
|-----------------------|---------|---------|-----------|---------|---------|---------|------------|----------|---------|---------|---------|----------------|-----------------------|---------|---------|--------|---------|---------|---------|---------|---------|-----------|----------|---------|
| ABW                   | 1       | .961**  | -.922*    | .937*   | -.980** | .962**  | .970**     | .960**   | .969**  | .955*   | .909*   | -.907*         | -.904*                | .914*   | .985**  | .798   | .977**  | .958*   | -.928*  | -.931*  | .979**  | -.981**   | .926*    | -.928*  |
| AFI                   | .961**  | 1       | -.810     | .831    | -.928*  | .878    | .933*      | .907*    | .903*   | .978**  | .869    | -.943*         | -.830                 | .902*   | .977**  | .915*  | .998**  | .997**  | -.978** | -.911*  | .982**  | -.953*    | .985**   | -.982** |
| Faecal pH             | -.922*  | -.810   | 1         | -.968** | .959*   | -.985** | -.960**    | -.971**  | -.980** | -.877   | -.956*  | .855           | .982**                | -.927*  | -.913*  | -.587  | -.844   | -.825   | .811    | .938*   | -.900*  | .945*     | -.788    | .801    |
| Lactate               | .937*   | .831    | -.968**   | 1       | -.974** | .989**  | .938*      | .968**   | .975**  | .860    | .924*   | -.809          | -.943*                | .873    | .921*   | .556   | .861    | .826    | -.782   | -.884*  | .892*   | -.943*    | .770     | -.776   |
| Ammonia               | -.980** | -.928*  | .959*     | -.974** | 1       | -.992** | -.987**    | -.995**  | -.995** | -.952*  | -.963** | .916*          | .959**                | -.945*  | -.985** | -.723  | -.947*  | -.928*  | .901*   | .953*   | -.970** | .993**    | -.892*   | .897*   |
| Acetate               | .962**  | .878    | -.985**   | .989**  | -.992** | 1       | .978**     | .992**   | .997**  | .917*   | .962**  | -.881*         | -.973**               | .933*   | .958*   | .648   | .904*   | .882*   | -.854   | -.943*  | .940*   | -.977**   | .840     | -.848   |
| Propionate            | .970**  | .933*   | -.960**   | .938*   | -.987** | .978**  | 1          | .992**   | .991**  | .976**  | .981**  | -.959**        | -.973**               | .982**  | .986**  | .776   | .950*   | .946*   | -.938*  | -.989** | .984**  | -.997**   | .925*    | -.932*  |
| Butyrate              | .960**  | .907*   | -.971**   | .968**  | -.995** | .992**  | .992**     | 1        | .998**  | .952*   | .985**  | -.929*         | -.982**               | .966**  | .976**  | .706   | .926*   | .914*   | -.897*  | -.970** | .963**  | -.991**   | .882*    | -.890*  |
| TSCFA                 | .969**  | .903*   | -.980**   | .975**  | -.995** | .997**  | .991**     | .998**   | 1       | .944*   | .975**  | -.916*         | -.979**               | .957*   | .973**  | .699   | .926*   | .910*   | -.890*  | -.965** | .961**  | -.990**   | .876     | -.883*  |
| LAB                   | .955*   | .978**  | -.877     | .860    | -.952*  | .917*   | .976**     | .952*    | .944*   | 1       | .944*   | -.989**        | -.912*                | .972**  | .988**  | .886*  | .981**  | .988**  | -.988** | -.975** | .995**  | -.980**   | .983**   | -.986** |
| BIF                   | .909*   | .869    | -.956*    | .924*   | -.963** | .962**  | .981**     | .985**   | .975**  | .944*   | 1       | -.945*         | -.992**               | .986**  | .948*   | .693   | .886*   | .886*   | -.889*  | -.982** | .941*   | -.970**   | .867     | -.878*  |
| <i>E. coli</i>        | -.907*  | -.943*  | .855      | -.809   | .916*   | -.881*  | -.959**    | -.929*   | -.916*  | -.989** | -.945*  | 1              | .909*                 | -.983** | -.958*  | -.884* | -.944*  | -.964** | .982**  | .980**  | -.972** | .955*     | -.971**  | .977**  |
| <i>C. perfringens</i> | -.904*  | -.830   | .982**    | -.943*  | .959**  | -.973** | -.973**    | -.982**  | -.979** | -.912*  | -.992** | .909*          | 1                     | -.969** | -.927*  | -.631  | -.855   | -.849   | .849    | .970**  | -.918*  | .958*     | -.823    | .837    |
| SOD                   | .914*   | .902*   | -.927*    | .873    | -.945*  | .933*   | .982**     | .966**   | .957*   | .972**  | .986**  | -.983**        | -.969**               | 1       | .956*   | .789   | .915*   | .926*   | -.942*  | -.998** | .963**  | -.970**   | .922*    | -.932*  |
| CAT                   | .985**  | .977**  | -.913*    | .921*   | -.985** | .958*   | .986**     | .976**   | .973**  | .988**  | .948*   | -.958*         | -.927*                | .956*   | 1       | .832   | .986**  | .979**  | -.961** | -.963** | .996**  | -.996**   | .957*    | -.959** |
| GpX                   | .798    | .915*   | -.587     | .556    | -.723   | .648    | .776       | .706     | .699    | .886*   | .693    | -.884*         | -.631                 | .789    | .832    | 1      | .897*   | .927*   | -.945*  | -.797   | .868    | -.789     | .956*    | -.951*  |
| IgA                   | .977**  | .998**  | -.844     | .861    | -.947*  | .904*   | .950*      | .926*    | .926*   | .981**  | .886*   | -.944*         | -.855                 | .915*   | .986**  | .897*  | 1       | .996**  | -.976** | -.926*  | .989**  | -.967**   | .980**   | -.978** |
| IgG                   | .958*   | .997**  | -.825     | .826    | -.928*  | .882*   | .946*      | .914*    | .910*   | .988**  | .886*   | -.964**        | -.849                 | .926*   | .979**  | .927*  | .996**  | 1       | -.991** | -.934*  | .988**  | -.959*    | .994**   | -.993** |
| FITC                  | -.928*  | -.978** | .811      | -.782   | .901*   | -.854   | -.938*     | -.897*   | -.890*  | -.988** | -.889*  | .982**         | .849                  | -.942*  | -.961** | -.945* | -.976** | -.991** | 1       | .947*   | -.979** | .943*     | -.998**  | 1.00**  |
| IL-6                  | -.931*  | -.911*  | .938*     | -.884*  | .953*   | -.943*  | -.989**    | -.970**  | -.965** | -.975** | -.982** | .980**         | .970**                | -.998** | -.963** | -.797  | -.926*  | -.934*  | .947*   | 1       | -.971** | .977**    | -.928*   | .938*   |
| IL-10                 | .979**  | .982**  | -.900*    | .892*   | -.970** | .940*   | .984**     | .963**   | .961**  | .995**  | .941*   | -.972**        | -.918*                | .963**  | .996**  | .868   | .989**  | .988**  | -.979** | -.971** | 1       | -.990**   | .975**   | -.977** |
| TNF-alpha             | -.981** | -.953*  | .945*     | -.943*  | .993**  | -.977** | -.997**    | -.991**  | -.990** | -.980** | -.970** | .955*          | .958*                 | -.970** | -.996** | -.789  | -.967** | -.959*  | .943*   | .977**  | -.990** | 1         | -.934*   | .939*   |
| TGF-beta              | .926*   | .985**  | -.788     | .770    | -.892*  | .840    | .925*      | .882*    | .876    | .983**  | .867    | -.971**        | -.823                 | .922*   | .957*   | .956*  | .980**  | .994**  | -.998** | -.928*  | .975**  | -.934*    | 1        | -.999** |
| MCP-1                 | -.928*  | -.982** | .801      | -.776   | .897*   | -.848   | -.932*     | -.890*   | -.883*  | -.986** | -.878*  | .977**         | .837                  | -.932*  | -.959** | -.951* | -.978** | -.993** | 1.00**  | .938*   | -.977** | .939*     | -.999**  | 1       |

ABW – average body weight; AFI – average feed intake; TSCFA – total short chain fatty acids; LAB – *Lactobacillus*; BIF – *Bifidobacterium*; SOD – superoxide dismutase; CAT – catalase; GpX – glutathione peroxidase; IgA – immunoglobulin A; IgG – immunoglobulin G; FITC – fluorescein isothiocyanate-dextran; IL-6 – interleukin 6; IL-10 – interleukin 10; TNF-alpha - tumour necrosis factor-alpha; TGF-beta – transforming growth factor; MCP-1 - Monocyte chemoattractant protein-1.
